# Supplementary material
Source: HighWire-hosted journal article supplement (https://bibliotheek.ehb.be/content/suppl/2024/06/26/12.3.e004195)
Supplement: bmjdrc-2024-004195supp001_data_supplement.pdf [file bmjdrc-2024-004195supp001_data_supplement.pdf]

## Supplementary Material

**Supplementary Table S1.** Results of the statistical analysis for wound closure rates at weeks 2, 4, 6, and 8 in ChitoCare and placebo arms. Number of patients with event/number of all patients with rates in brackets are presented with *P* value based on Fisher's exact probability test.

|                                | ChitoCare arm | Placebo arm  | <i>P</i> value |
|--------------------------------|---------------|--------------|----------------|
| <b>Complete wound closure:</b> |               |              |                |
| Week 2                         | 0/18 (0.0%)   | 0/24 (0.0%)  | /              |
| Week 4                         | 1/18 (5.6%)   | 0/24 (0.0%)  | 0.429          |
| Week 6                         | 1/18 (5.6%)   | 1/24 (4.2%)  | 1.000          |
| Week 8                         | 1/18 (5.6%)   | 1/24 (4.2%)  | 1.000          |
| <b>75% wound closure:</b>      |               |              |                |
| Week 2                         | 2/18 (11.1%)  | 1/24 (4.2%)  | 0.567          |
| Week 4                         | 3/18 (16.7%)  | 1/24 (4.2%)  | 0.297          |
| Week 6                         | 6/18 (33.3%)  | 3/24 (12.5%) | 0.139          |
| Week 8                         | 7/18 (38.9%)  | 3/24 (12.5%) | 0.070          |
| <b>50% wound closure:</b>      |               |              |                |
| Week 2                         | 2/18 (11.1%)  | 2/24 (8.3%)  | 1.000          |
| Week 4                         | 5/18 (27.8%)  | 3/24 (12.5%) | 0.256          |
| Week 6                         | 9/18 (50.0%)  | 4/24 (16.7%) | <b>0.041</b>   |
| Week 8                         | 11/18 (61.1%) | 5/24 (20.8%) | <b>0.011</b>   |

**Supplementary Table S2.** Results of the statistical analysis for the relative reduction in wound surface area and the improvement in wound state at weeks 2, 4, 6, and 8 in ChitoCare and placebo arms. Total N is smaller for some outcomes due to patient drop-out or missing data. Statistically significant results (P values < 0.05) are marked in bold. P values are based on nonparametric Mann-Whitney U test.

|                                                                | ChitoCare arm                                                                      | Placebo arm                            | P value                      |
|----------------------------------------------------------------|------------------------------------------------------------------------------------|----------------------------------------|------------------------------|
| <b>Relative reduction (%) in wound surface area*</b> (N total) |                                                                                    |                                        |                              |
|                                                                | Median (Q <sub>1</sub> ; Q <sub>3</sub> )                                          |                                        |                              |
|                                                                | Mean (SD)                                                                          |                                        |                              |
| Week 2                                                         | 18<br>20.3 (2.1; 40.0)<br>16.6 (42.2)                                              | 24<br>1.4 (-18.3; 23.8)<br>2.4 (38.3)  | 0.124                        |
| Week 4                                                         | 15<br>34.6 (-7.0; 72.0)<br>34.9 (41.8)                                             | 20<br>6.5 (0.2; 39.6)<br>17.6 (35.6)   | 0.199                        |
| Week 6                                                         | 13<br>68.3 (41.0; 81.0)<br>60.3 (30.3)                                             | 19<br>18.0 (9.3; 41.8)<br>24.8 (36.6)  | <b>0.009</b>                 |
| Week 8                                                         | 13<br>76.8 (64.6; 89.5)<br>70.3 (27.7)                                             | 17<br>29.6 (6.4; 48.8)<br>19.1 (70.7)  | <b>0.004</b>                 |
| <b>Bates-Jensen wound assesment</b> (N total)                  |                                                                                    |                                        |                              |
|                                                                | Relative change (%) from baseline score: Median (Q <sub>1</sub> ; Q <sub>3</sub> ) |                                        |                              |
|                                                                | Score†: Median (Q <sub>1</sub> ; Q <sub>3</sub> )                                  |                                        |                              |
| Week 2                                                         | 16<br>2.0 (-13.9; 0.0)<br>25 (23; 30)                                              | 22<br>0.0 (0.0; 0.0)<br>27 (26; 28)    | <b>0.023</b><br>0.467        |
| Week 4                                                         | 14<br>-18.5 (-36.7; 0.0)<br>20.5 (19; 28)                                          | 19<br>0.0 (-4.2; 3.7)<br>27 (23; 29)   | <b>0.006</b><br><b>0.020</b> |
| Week 6                                                         | 12<br>-22.6 (-43.7; 2.0)<br>20 (16; 25)                                            | 18<br>-1.7 (-7.7; 3.7)<br>27 (23; 29)  | <b>0.027</b><br><b>0.009</b> |
| Week 8                                                         | 12<br>-27.5 (-45.9; -11.6)<br>19.5 (15; 23.5)                                      | 17<br>-3.6 (-14.8; 3.3)<br>24 (21; 28) | <b>0.023</b><br><b>0.028</b> |

\* A negative value implies an increase in wound surface area

† A lower score implies a better wound state



**STUDY CENTRES AND INVESTIGATORS**

University Hospital Centre Ljubljana, Slovenia: Vilma Urbančič Rovan, MD, PhD

General Hospital Celje, Slovenia: Maja Navodnik Preložnik, MD; Lučka Leskovšek, MD

Clinic Golnik – Diabetic Clinic Kranj, Slovenia: Marjan Kristanc, MD

General Hospital Murska Sobota, Slovenia: Zorancho Trpkovski, MD

University Clinic Vuk Vrhovac, Croatia: Krešimir Martinac, MD
